# Supplementary material for: A Bayesian model to correct underestimated 3-D wind speeds from sonic anemometers increases turbulent components of the surface energy balance
Source: Copernicus journal article supplement (doi:10.5194/amt-9-5933-2016), 2016-12-12
Supplement: Supplementary file [file amt-9-5933-2016-supplement-title-page.pdf › amt-9-5933-2016-supplement-title-page.pdf]

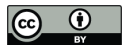

## *Supplement of*

# **A Bayesian model to correct underestimated 3-D wind speeds from sonic anemometers increases turbulent components of the surface energy balance**

**John M. Frank et al.**

*Correspondence to:* John M. Frank (jfrank@fs.fed.us)

- amt-9-5933-2016-supplement-title-page.pdf
- ARDEC field validation 1.jpg
- ARDEC field validation 2.jpg
- Bayesian analysis code.R
- Posterior correction MCMC chains.csv

The copyright of individual parts of the supplement might differ from the CC-BY 3.0 licence.
